# Supplementary material
Source: PubMed Central journal article supplement (PMC3025662)
Supplement: NIHMS258693-supplement-1_si_001.pdf [file NIHMS258693-supplement-1_si_001.pdf]

## SUPPORTING INFORMATION

### **Backbone Degradable Multiblock *N*-(2-Hydroxypropyl)methacrylamide Copolymer Conjugates via Reversible Addition Fragmentation Chain Transfer Polymerization and Thiol-ene Coupling Reaction**

Huaizhong Pan, Jiyuan Yang, Pavla Kopečková, and Jindřich Kopeček\*  
Departments of Pharmaceutics and Pharmaceutical Chemistry, and of Bioengineering,  
University of Utah, Salt Lake City, UT 84112

\*To whom correspondence should be addressed

Email: [jindrich.kopecek@utah.edu](mailto:jindrich.kopecek@utah.edu)

Telephone: (801) 581-7211

Fax: (801) 581-7848

## Methods

Mass spectrum was measured on an FTMS mass spectrometer (LTQ-FT, ThermoElectron, Waltham, MA).  $^1\text{H-NMR}$  spectra were recorded on a Mercury400 spectrometer using  $\text{DMSO-d}_6$  as the solvent. Stability of Peptide2CTA was determined on RP-HPLC (Agilent Technologies 1100 series, Zorbax C8 column  $4.6 \times 150$  mm) with gradient elution from 2 to 90% of Buffer B within 30 min at flow rate of 1.0 mL/min (Buffer A: deionized water with 0.1% TFA, Buffer B: acetonitrile with 0.1% TFA).

## Mass spectrum of Peptide2CTA

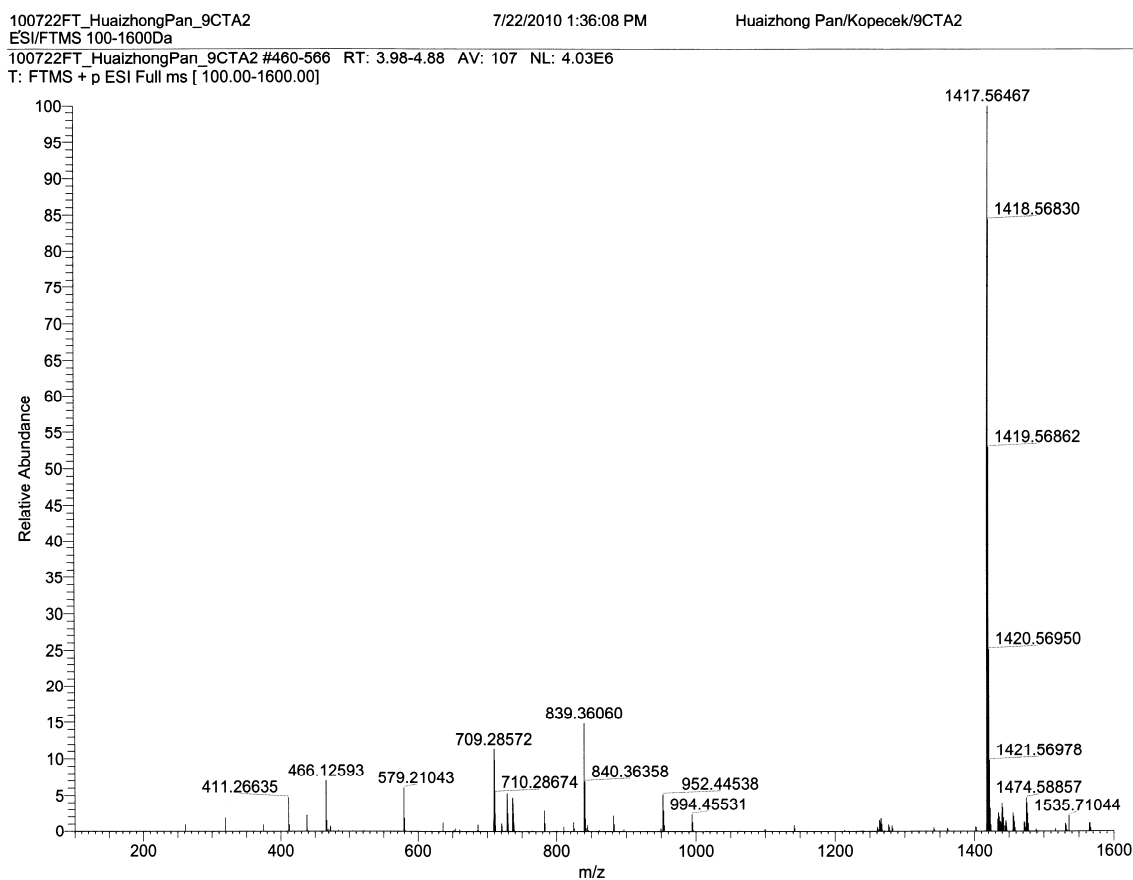

<sup>1</sup>H-NMR spectrum of Peptide2CTA

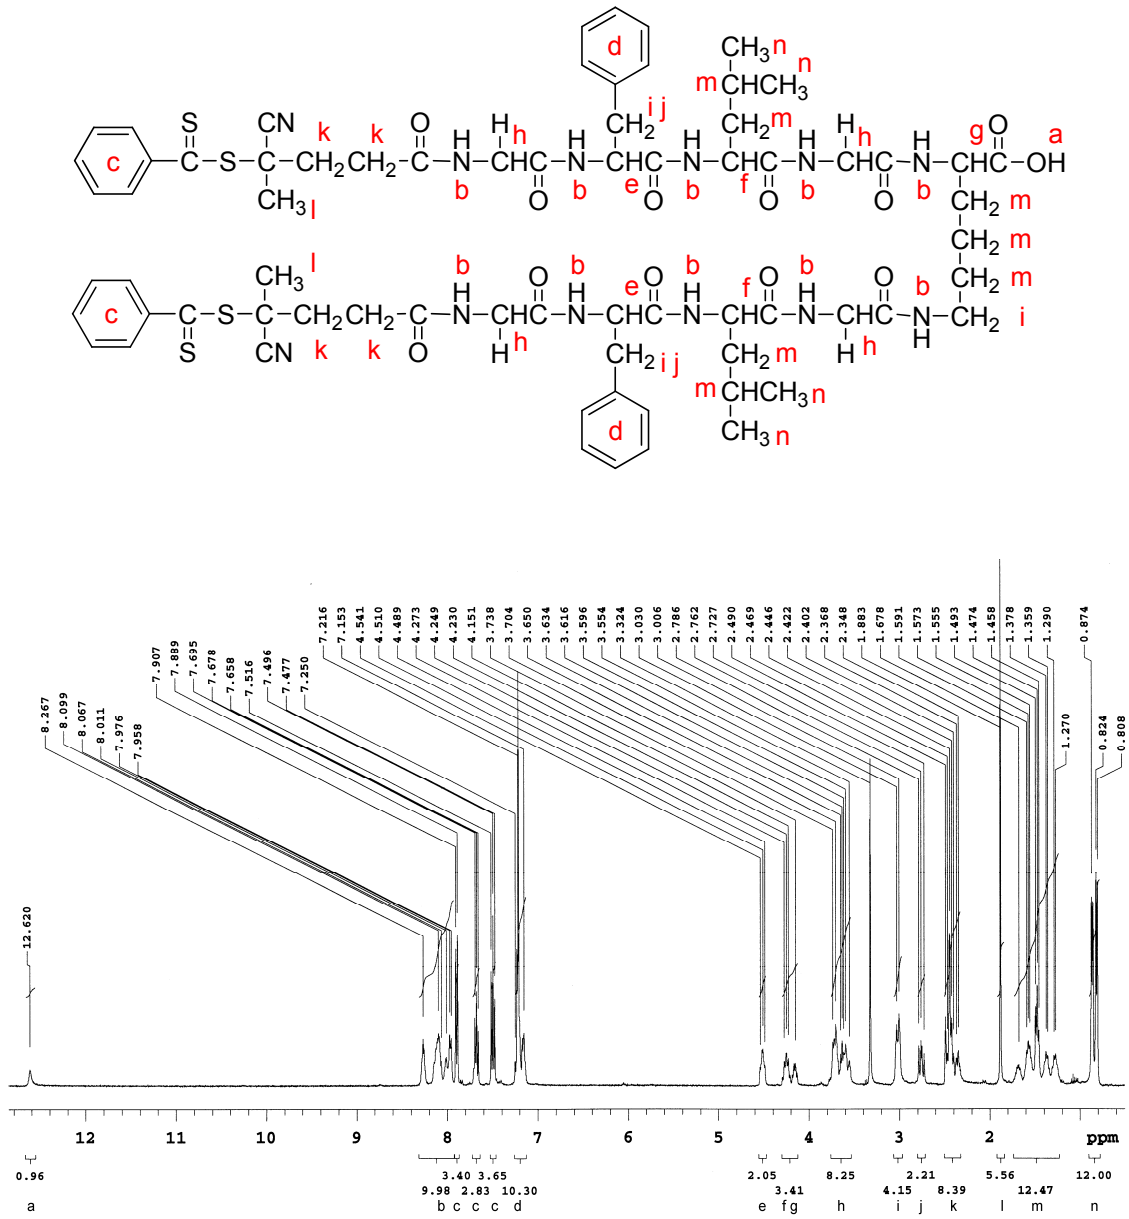

<sup>13</sup>C-NMR spectrum of Peptide2CTA

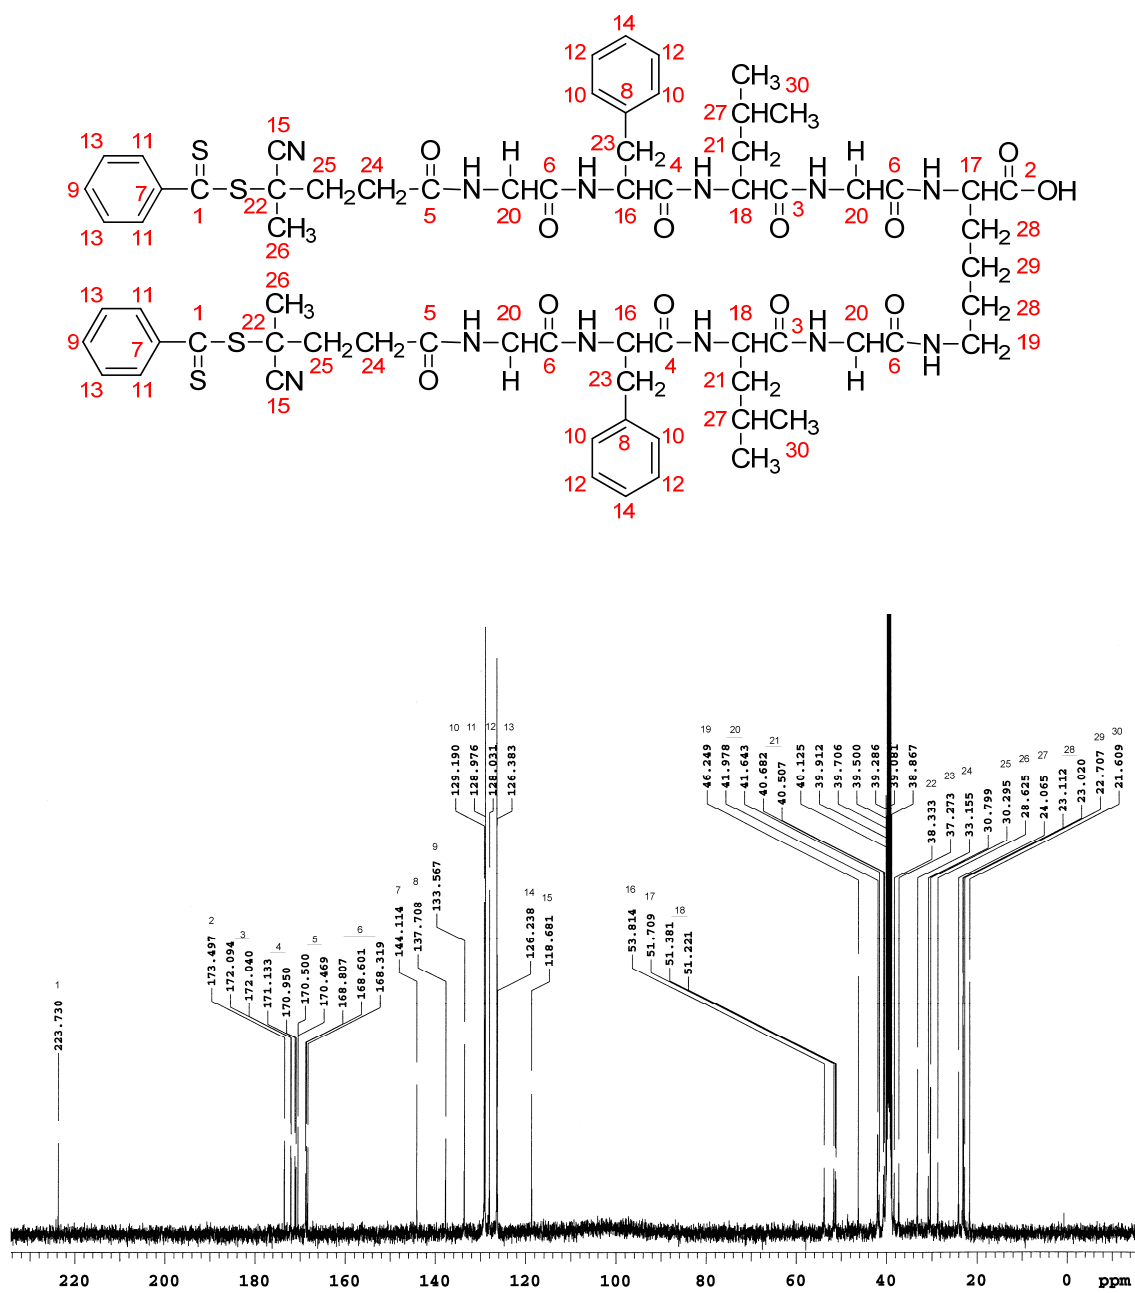

## Stability of Peptide2CTA under polymerization condition

Peptide2CTA was dissolved in methanol (~1 mg/mL) with or without AIBN (AIBN/Peptide2CTA, 2/5 mol/mol). The solution was bubbled with N<sub>2</sub> for 30 min, sealed and incubated at 50 °C for 24 h or at room temperature for 2 weeks. The stability of Peptide2CTA was measured by RP-HPLC.

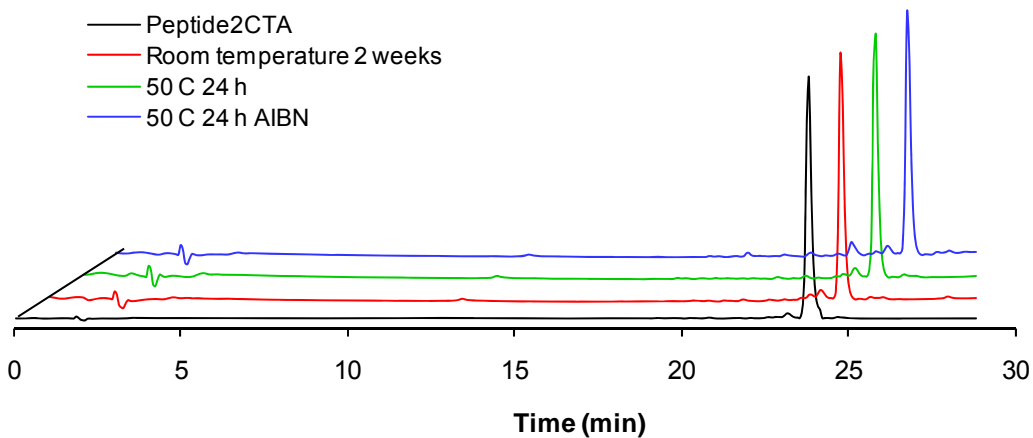

Peptide2CTA peak appeared at 23.8 min. The results showed that the CTA is pure and very stable during incubation in methanol with or without AIBN. A small peak appeared at 22.1 min in HPLC profile of Peptide2CTA after incubation with AIBN at 50 °C for 24 h; it may be the result of minor exchange reaction between Peptide2CTA and AIBN.
